# Supplementary material for: Controlled crystallization of twinned crystalline guanine microplatelets
Source: Royal Society of Chemistry journal article supplement (doi:10.1039/c9ce00920e), 2019-01-01
Supplement: c9ce00920e1.pdf [file c9ce00920e1.pdf]

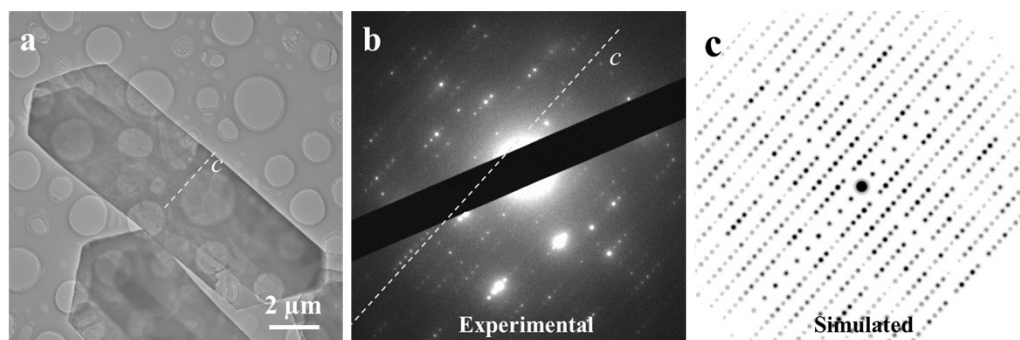

Figure S1. Elongated hexagonal guanine micro-platelets obtained together with STGP in formamide AG of P(VP-co-VA). a) TEM image and b-c) experimental and simulated SAED patterns.

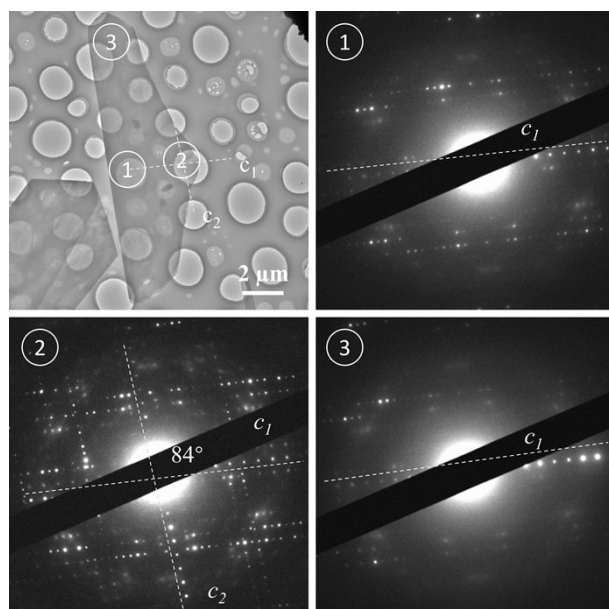

Figure S2. The TEM images and SAED patterns of one irregular-shape STGP obtained in formamide AG of P(VP-co-VA). The angle between the observed diffraction vectors  $c_1$  and  $c_2$  of the center of the STGP was about 84°.

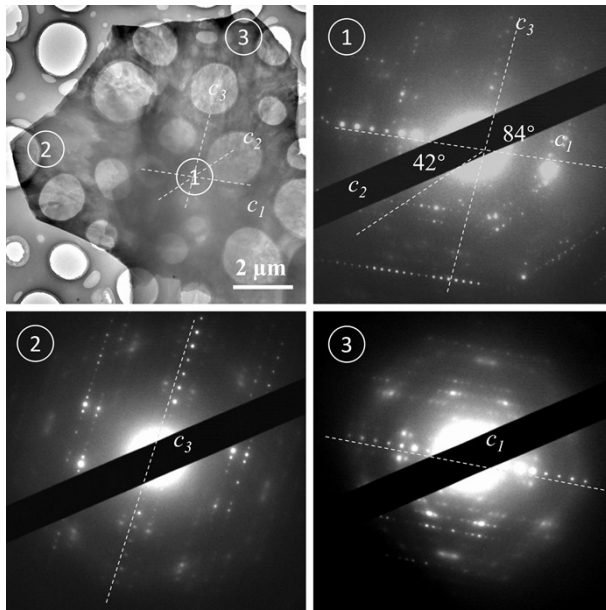

Figure S3. The TEM images and SAED patterns of irregular-shape STGP obtained in formamide AG of P(VP-co-VA). The angles between the observed diffraction vectors  $c_1$  and  $c_2$ ,  $c_1$  and  $c_3$  of the center area of the STGPs were about  $42^\circ$  and  $84^\circ$ , respectively.

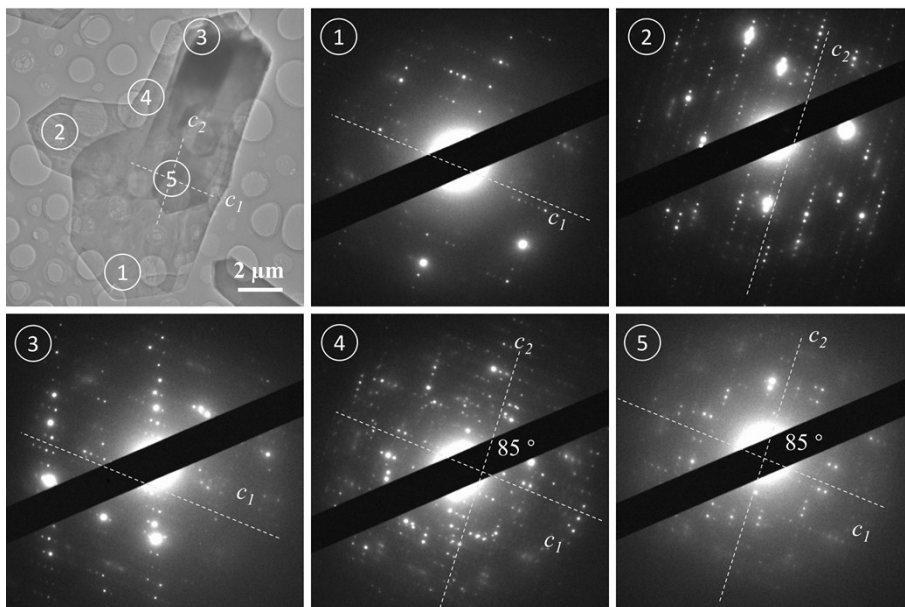

Figure S4. The TEM images and SAED patterns of irregular shape STGP obtained in formamide AG of P(VP-co-VA).

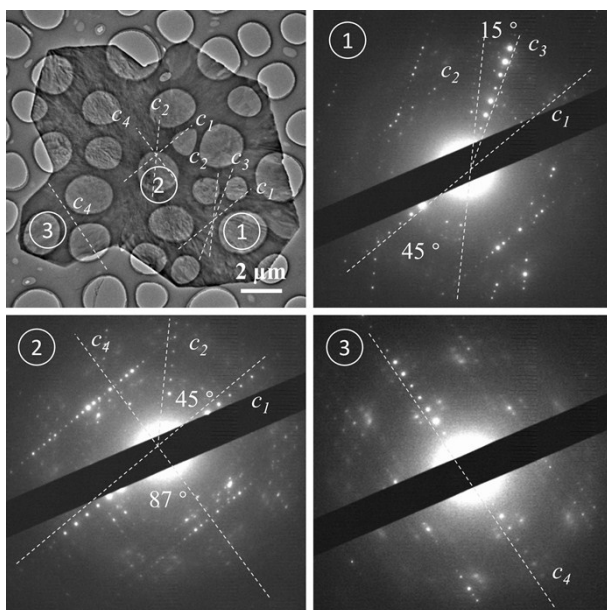

Figure S5. The TEM images and SAED patterns of irregular-shape STGP obtained in formamide AG of P(VP-co-VA).

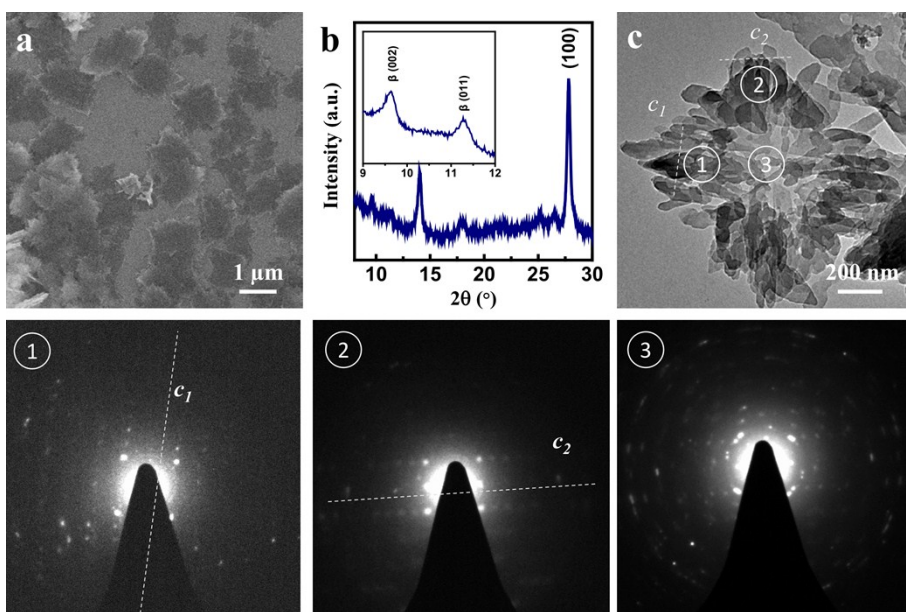

Figure S6. Characterizations of porous microstructures of AG  $\beta$  form crystals obtained in water AG of PVP. a) SEM image, b) PXRD, c) TEM image and SAED patterns.
